# Supplementary material for: Bringing Dicynodonts Back to Life: Paleobiology and Anatomy of a New Emydopoid Genus from the Upper Permian of Mozambique
Source: PLoS One. 2013 Dec 4;8(12):e80974. doi: 10.1371/journal.pone.0080974 (PMC3852158; doi:10.1371/journal.pone.0080974)
Supplement: Table S3 — Body mass versus encephalization volume data based on Rowe et al. (2011) and Franzosa (2004). (XLSX) [file pone.0080974.s005.xlsx]

## Sheet: Rowe et al 2011 data
Taxon	Mass (g)	Log mass	EV (ml)	Log EV	EQ
Niassodon mfumukazi	491	2.69108	1.062	0.0261245
Asioryctes nemegetensis	43.2	1.63548	0.5	-0.301	0.56
Canus lupus	36500	4.56229	153.937	2.18734	1.18
Chulsanbaatar vulgaris	13.3	1.12385	0.22	-0.6576	0.55
Dasypus novemcinctus	4000	3.60206	10.546	1.02309	0.41
Dasyurus hallucatus	401	2.60314	3.339	0.52362	0.72
Diademodon sp	50000	4.69897	26.971	1.4309	0.16
Didelphis virginiana	2800	3.44716	6.608	0.82007	0.34
Dromiciops gliroides	21.5	1.33244	0.821	-0.0857	1.54
Exaeretodon sp.	46877	4.67096	19.19	1.28307	0.12
Felis silvestris catus	4500	3.65321	28.276	1.45142	1.02
Hadrocodium wui	2	0.30103	0.04515	-1.3453	0.49
Kennalestes gobiensis	39	1.59106	0.299	-0.5243	0.36
Kryptobaatar dashzevegi	28.1	1.44871	0.343	-0.4647	0.53
Leptictis dakotensis	700	2.8451	6	0.77815	0.86
Manis tricuspis	4500	3.65321	10.711	1.02983	0.39
Massetognathus sp.	1865	3.27068	3.33	0.52244	0.23
Monodelphis domestica	80.4	1.90526	0.954	-0.0205	0.68
Morganucodon sp.	51	1.70757	0.325	-0.4881	0.32
Obdurodon dicksoni	2038	3.3092	15.443	1.18873	1
Ornithorhynchus anatinus	1389	3.1427	9.732	0.9882	0.84
Orycteropus afer	60000	4.77815	103.943	2.0168	0.55
Phascolarctos cinereus	9500	3.97772	26.275	1.41954	0.54
Probainognathus jenseni	590	2.77085	1.2	0.07918	0.19
Probelesodon sp.	3807	3.58058	4.33	0.63649	0.18
Procavia capensis	3800	3.57978	14.337	1.15646	0.58
Ptilodus sp.	163	2.21219	1.48	0.17026	0.39
Pucadelphys andinus	49	1.6902	0.312	-0.5058	0.32
Tachyglossus aculeatus	4250	3.62839	20.013	1.30131	0.75
Therioherpeton cargnini	80.4	1.90526	0.36	-0.4437	0.18
Thrinaxodon liorhinus	700	2.8451	1.462	0.16495	0.21
Trichechus senegalensis	140000	5.14613	374.556	2.57352	1.06
Triconodon sp.	138	2.13988	0.82	-0.0862	0.39
Vincelestes neuquenianus	900	2.95424	2.371	0.37493	0.37
Vombatus ursinus	25000	4.39794	63.553	1.80314	0.64
Zaglossus bruijni	7500	3.87506	36.049	1.55689	0.89
Zalambdalestes lechei	82.69	1.91745	1.02	0.0086	0.7

## Sheet: Franzosa 2004
Taxon	MBd(g)	Log MBd	MBr (g)	Volume (ml)	Log Vol
Niassodon mfumukasi	491	2.69108		1.062	0.0261245
A. atokensis	1000000	6	190.811	0.00524079	-2.2806
Allosaurus fragilis	1000000	6	169	0.00591716	-2.22789
Anas plaryrhynchos	720	2.85733	6.8214	0.146598	-0.833873
Anas plaryrhynchos	1580	3.19866	6.8214	0.146598	-0.833873
Anhanguera santanae	7600	3.88081	8.15877	0.122568	-0.911624
Apteryxsp.	880	2.94448	9.38081	0.106601	-0.97224
Apteryxsp.	3850	3.58546	9.38081	0.106601	-0.97224
A. lithographica	300	2.47712	1.76	0.568182	-0.245513
A. lithographica	400	2.60206	1.76	0.568182	-0.245513
Byronosaurus	-		4.55917	0.219338	-0.658886
C. saharicus	4000000	6.60206	224.4	0.00445633	-2.35102
C. saharicus	7400000	6.86923	224.4	0.00445633	-2.35102
C. magnicornis	324000	5.51055	87.6961	0.011403	-1.94298
C. magnicornis	700000	5.8451	87.6961	0.011403	-1.94298
Chauna chavaria	2201	3.34262	7.97489	0.125394	-0.901725
Citipati osmolskae	62153	4.79346	24.9888	0.040018	-1.39774
Crocodylus acutus	134000	5.1271	15.6	0.0641026	-1.19312
Crocodylus moreleti	-		15.848	0.0630996
Crypturellus cinnamomeus	440	2.64345	1.50295	0.665358	-0.176945
Dillornis gigantell$	117000	5.06819	32.3812	0.0308822	-1.51029
Dillornis gigantell$	200000	5.30103	32.3812	0.0308822	-1.51029
Diplodocus hayi	12000000	7.07918	87.7848	0.0113915	-1.94342
Diplodocus hayi	19000000	7.27875	87.7848	0.0113915	-1.94342
Dromiceiomimus brevitertius	125000	5.09691	87.85	0.011383	-1.94374
Dromiceiomimus brevitertius	175000	5.24304	87.85	0.011383	-1.94374
Majungatholus atopus	-		168.272	0.00594276
Mongolodon junior	-		26.4793	0.0377654
Rhamphorhynchus muensteri	136	2.13354	0.794479	1.25869	0.0999176
Saurosuchus galilei	-		60.8999	0.0164204	-1.78462
Troodon formosus	45000	4.65321	45	0.0222222	-1.65321
Tyrannosaurus rex	4000000	6.60206	530	0.00188679	-2.72428
Tyrannosaurus rex	7400000	6.86923	530	0.00188679	-2.72428
Zos Canyon troodontid	-		3.10417	0.322147

## Sheet: Sheet3
Taxon	Mass (g)	Log mass	EV (ml)	Log EV	364	2.5611
Niassodon mfumukasi	491	2.69108	1.062	0.0261245	849	2.92891
Asioryctes nemegetensis	43.2	1.63548	0.5	-0.301
Canus lupus	36500	4.56229	153.937	2.18734
Chulsanbaatar vulgaris	13.3	1.12385	0.22	-0.6576
Dasypus novemcinctus	4000	3.60206	10.546	1.02309
Dasyurus hallucatus	401	2.60314	3.339	0.52362
Diademodon sp	50000	4.69897	26.971	1.4309
Didelphis virginiana	2800	3.44716	6.608	0.82007
Dromiciops gliroides	21.5	1.33244	0.821	-0.0857
Exaeretodon sp.	46877	4.67096	19.19	1.28307
Felis silvestris catus	4500	3.65321	28.276	1.45142
Hadrocodium wui	2	0.30103	0.04515	-1.3453
Kennalestes gobiensis	39	1.59106	0.299	-0.5243
Kryptobaatar dashzevegi	28.1	1.44871	0.343	-0.4647
Leptictis dakotensis	700	2.8451	6	0.77815
Manis tricuspis	4500	3.65321	10.711	1.02983
Massetognathus sp.	1865	3.27068	3.33	0.52244
Monodelphis domestica	80.4	1.90526	0.954	-0.0205
Morganucodon sp.	51	1.70757	0.325	-0.4881
Obdurodon dicksoni	2038	3.3092	15.443	1.18873
Ornithorhynchus anatinus	1389	3.1427	9.732	0.9882
Orycteropus afer	60000	4.77815	103.943	2.0168
Phascolarctos cinereus	9500	3.97772	26.275	1.41954
Probainognathus jenseni	590	2.77085	1.2	0.07918
Probelesodon sp.	3807	3.58058	4.33	0.63649
Procavia capensis	3800	3.57978	14.337	1.15646
Ptilodus sp.	163	2.21219	1.48	0.17026
Pucadelphys andinus	49	1.6902	0.312	-0.5058
Tachyglossus aculeatus	4250	3.62839	20.013	1.30131
Therioherpeton cargnini	80.4	1.90526	0.36	-0.4437
Thrinaxodon liorhinus	700	2.8451	1.462	0.16495
Trichechus senegalensis	140000	5.14613	374.556	2.57352
Triconodon sp.	138	2.13988	0.82	-0.0862
Vincelestes neuquenianus	900	2.95424	2.371	0.37493
Vombatus ursinus	25000	4.39794	63.553	1.80314
Zaglossus bruijni	7500	3.87506	36.049	1.55689
Zalambdalestes lechei	82.69	1.91745	1.02	0.0086
A. atokensis	1000000	6	0.00524079	2.2806	2.2806	2.2806
Allosaurus fragilis	1000000	6	0.00591716	2.22789	2.22789	2.22789
Anas plaryrhynchos	720	2.85733	0.146598	0.833873	0.833873	0.833873
Anas plaryrhynchos	1580	3.19866	0.146598	0.833873	0.833873	0.833873
Anhanguera santanae	7600	3.88081	0.122568	0.911624	0.911624	0.911624
Apteryxsp.	880	2.94448	0.106601	0.97224	0.97224	0.97224
Apteryxsp.	3850	3.58546	0.106601	0.97224	0.97224	0.97224
A. lithographica	300	2.47712	0.568182	0.245513	0.245513	0.245513
A. lithographica	400	2.60206	0.568182	0.245513	0.245513	0.245513
C. saharicus	4000000	6.60206	0.00445633	2.35102	2.35102	2.35102
C. saharicus	7400000	6.86923	0.00445633	2.35102	2.35102	2.35102
C. magnicornis	324000	5.51055	0.011403	1.94298	1.94298	1.94298
C. magnicornis	700000	5.8451	0.011403	1.94298	1.94298	1.94298
Chauna chavaria	2201	3.34262	0.125394	0.901725	0.901725	0.901725
Citipati osmolskae	62153	4.79346	0.040018	1.39774	1.39774	1.39774
Crocodylus acutus	134000	5.1271	0.0641026	1.19312	1.19312	1.19312
Crypturellus cinnamomeus	440	2.64345	0.665358	0.176945	0.176945	0.176945
Dinornis giganteus	117000	5.06819	0.0308822	1.51029	1.51029	1.51029
Dinornis giganteus	200000	5.30103	0.0308822	1.51029	1.51029	1.51029
Diplodocus hayi	12000000	7.07918	0.0113915	1.94342	1.94342	1.94342				Bird
Diplodocus hayi	19000000	7.27875	0.0113915	1.94342	1.94342	1.94342				Dinosaur
Dromiceiomimus brevitertius	125000	5.09691	0.011383	1.94374	1.94374	1.94374				Pterosaur
Dromiceiomimus brevitertius	175000	5.24304	0.011383	1.94374	1.94374	1.94374				Crocodyle
Rhamphorhynchus muensteri	136	2.13354	1.25869	0.0999176	0.0999176	0.0999176
Troodon formosus	45000	4.65321	0.0222222	1.65321	1.65321	1.65321
Tyrannosaurus rex	4000000	6.60206	0.00188679	2.72428	2.72428	2.72428
Tyrannosaurus rex	7400000	6.86923	0.00188679	2.72428	2.72428	2.72428
